# Supplementary material
Source: Research Square preprint supplement (doi:10.21203/rs.3.rs-9467244/v1)
Supplement: Supplementary file 1 [file 02e5f7a5dc08683ae7b3c4aa.pdf]

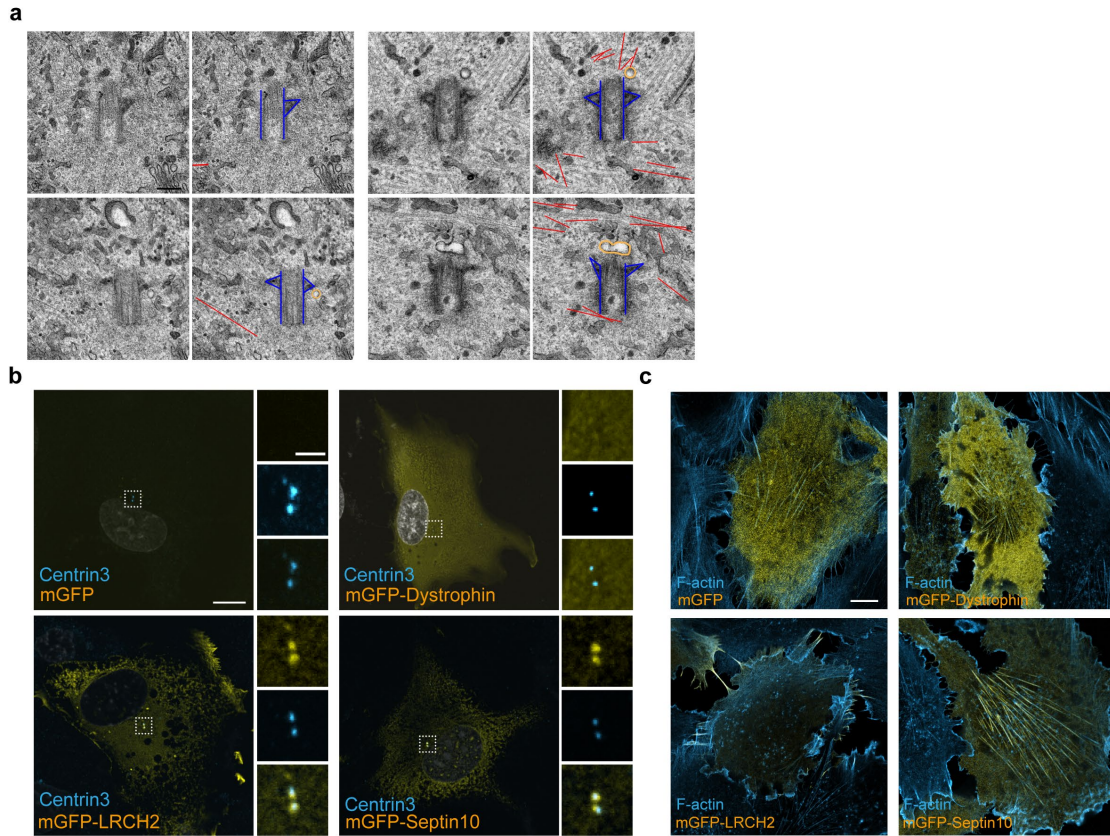

1

2

**Supplementary Fig. 1 | Screening for mediators of centrosomal branched actin in ciliogenesis regulation.**

3

4

**a**, Transmission electron microscopy images showing the distribution of F-actin (red) and ciliary vesicles (yellow) around the centrosome (blue) in cells expressing mEmerald-PACT or mEmerald-PACT-VCA. Scale bar: 200 nm.

6

**b**, Centrosomal localization of multiple actin-microtubule crosslinking proteins. Centrin3 marks centrosomes. Scale bars: 10  $\mu\text{m}$  (2  $\mu\text{m}$  for insets).

7

**c**, Confocal images of candidate proteins (yellow) with F-actin (blue). Scale bar: 10  $\mu\text{m}$ .

8

9



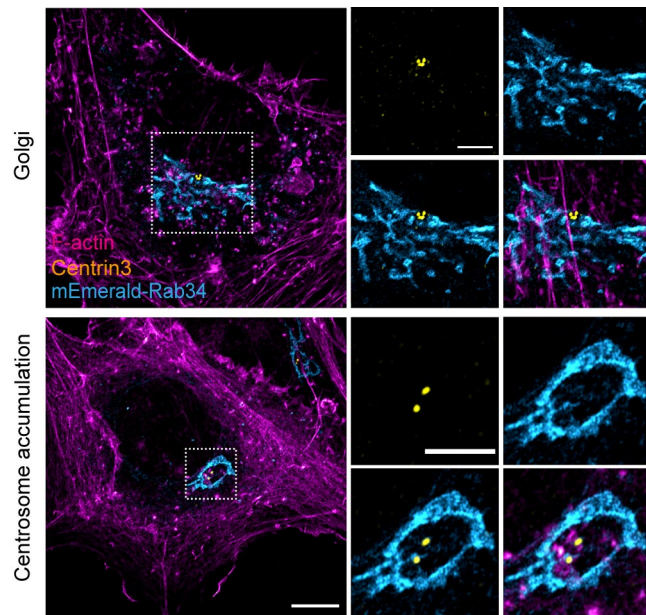

21  
22  
23  
24  
25

**Supplementary Fig. 3 | Localization pattern of Rab34.**

Immunofluorescence images of Centrin3 (yellow) in cells expressing mEmerald-Rab34 (blue), with F-actin marked by phalloidin (pink). Scale bars: 10  $\mu\text{m}$  (5  $\mu\text{m}$  for insets)

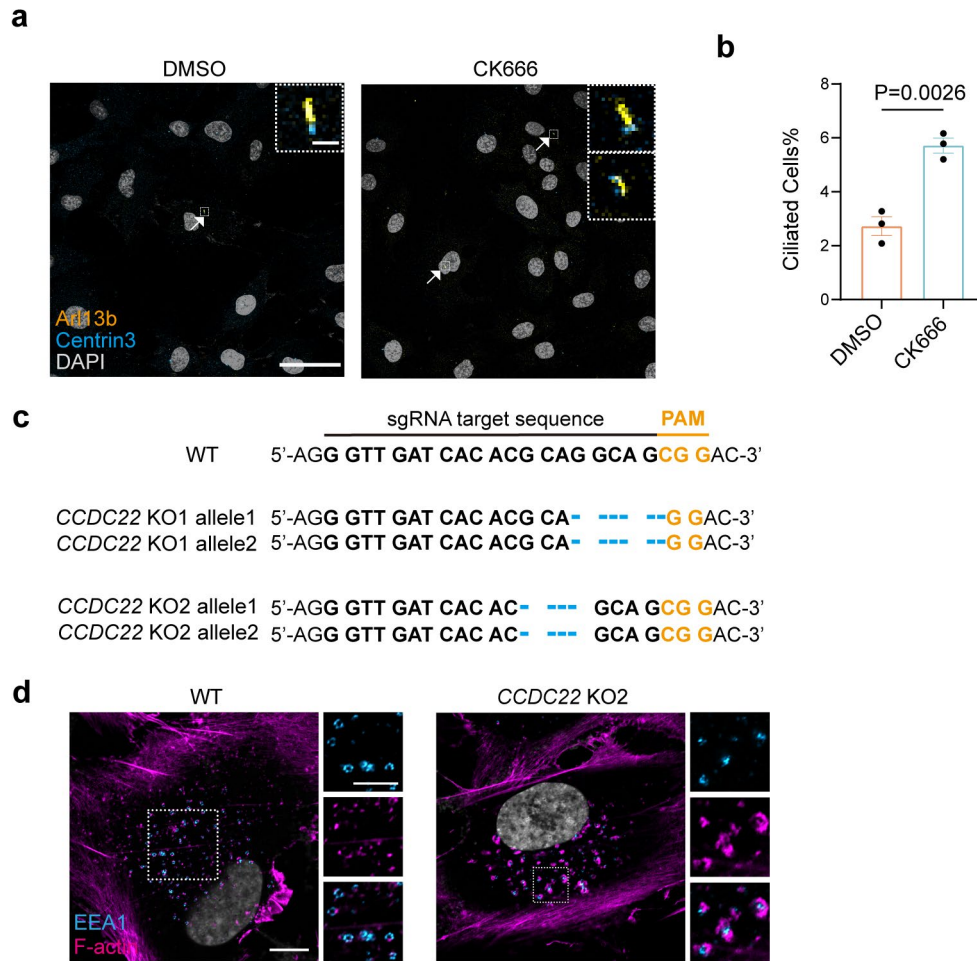

26

27 **Supplementary Fig. 4 | CCDC22 deficiency impairs ciliogenesis.**

28 **a**, Immunofluorescence staining of cilia (marked by Arl13b, yellow) and centrosomes (marked by  
 29 Centrin3, blue) in RPE1 cells treated with the branching actin inhibitor CK666 (200  $\mu$ M) for 12 h.  
 30 Scale bars: 20  $\mu$ m (1  $\mu$ m for insets). **b**, Quantification of the percentage of ciliated cells in **a**. Data  
 31 are shown as mean  $\pm$  s.e.m.; n = 3 independent experiments. Statistical significance was determined  
 32 by an unpaired two-tailed t-test. **c**, Genotyping of *CCDC22* KO cells. **d**, Immunofluorescence  
 33 images of the endosomal marker EEA1 (blue) in WT and *CCDC22* KO cells, with F-actin marked  
 34 by phalloidin (pink). Scale bars: 10  $\mu$ m (5  $\mu$ m for insets).

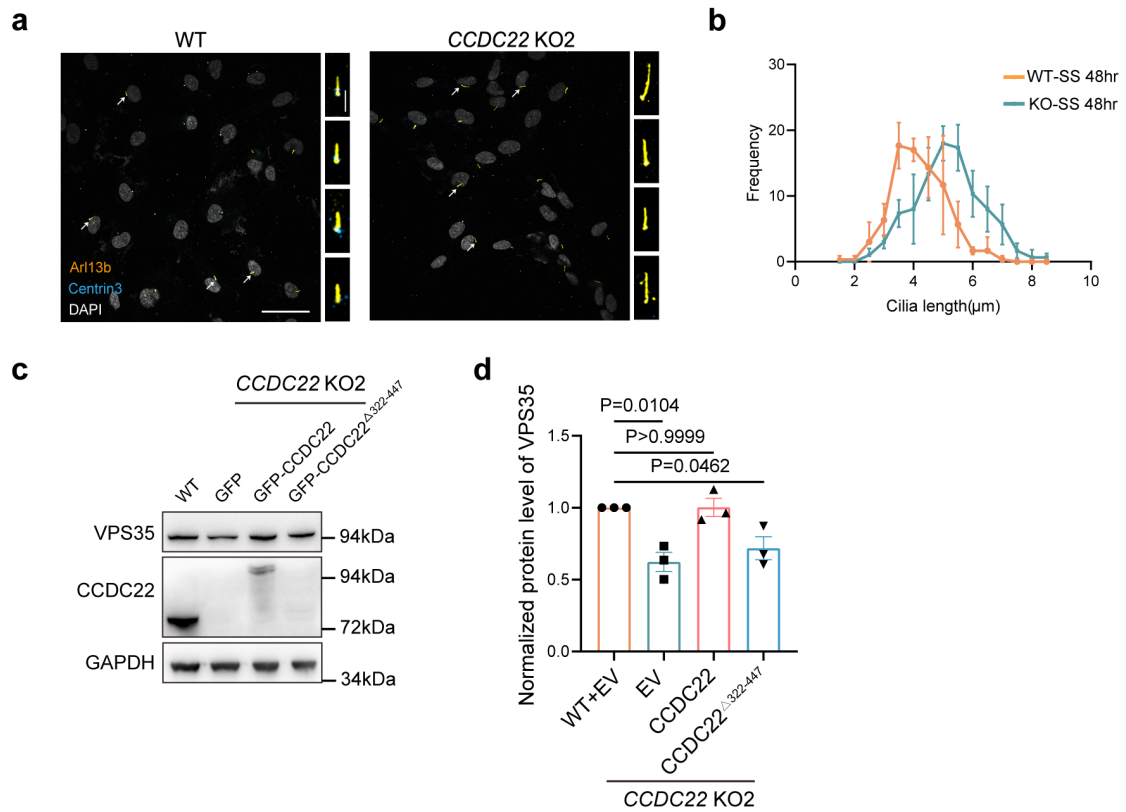

35

36 **Supplementary Fig.5 | Ciliogenesis is impaired in *CCDC22* KO cells.**

37 **a**, Immunofluorescence images of cilia (Arl13b, yellow) and centrosome (Centrin3, blue) in WT  
 38 and *CCDC22* KO cells after 48 h of serum starvation. **b**, Distribution of cilium length in WT and  
 39 *CCDC22* KO cells after 48 h of serum starvation. Data are presented as mean  $\pm$  s.e.m.; n = 3  
 40 independent experiments. **c**, Immunoblot analysis of the recycling endosome protein VPS35 in WT  
 41 cells, *CCDC22* KO cells, and *CCDC22* KO cells reconstituted with either full-length *CCDC22* or  
 42 the *CCDC22* $\Delta$ 322-447 mutant. **d**, Quantification of protein level of VPS35 in **c**, normalized by GAPDH.  
 43 Data are shown as mean  $\pm$  s.e.m.; n = 3 independent experiments. Statistical significance was  
 44 determined by one-way ANOVA with multiple comparisons.

45



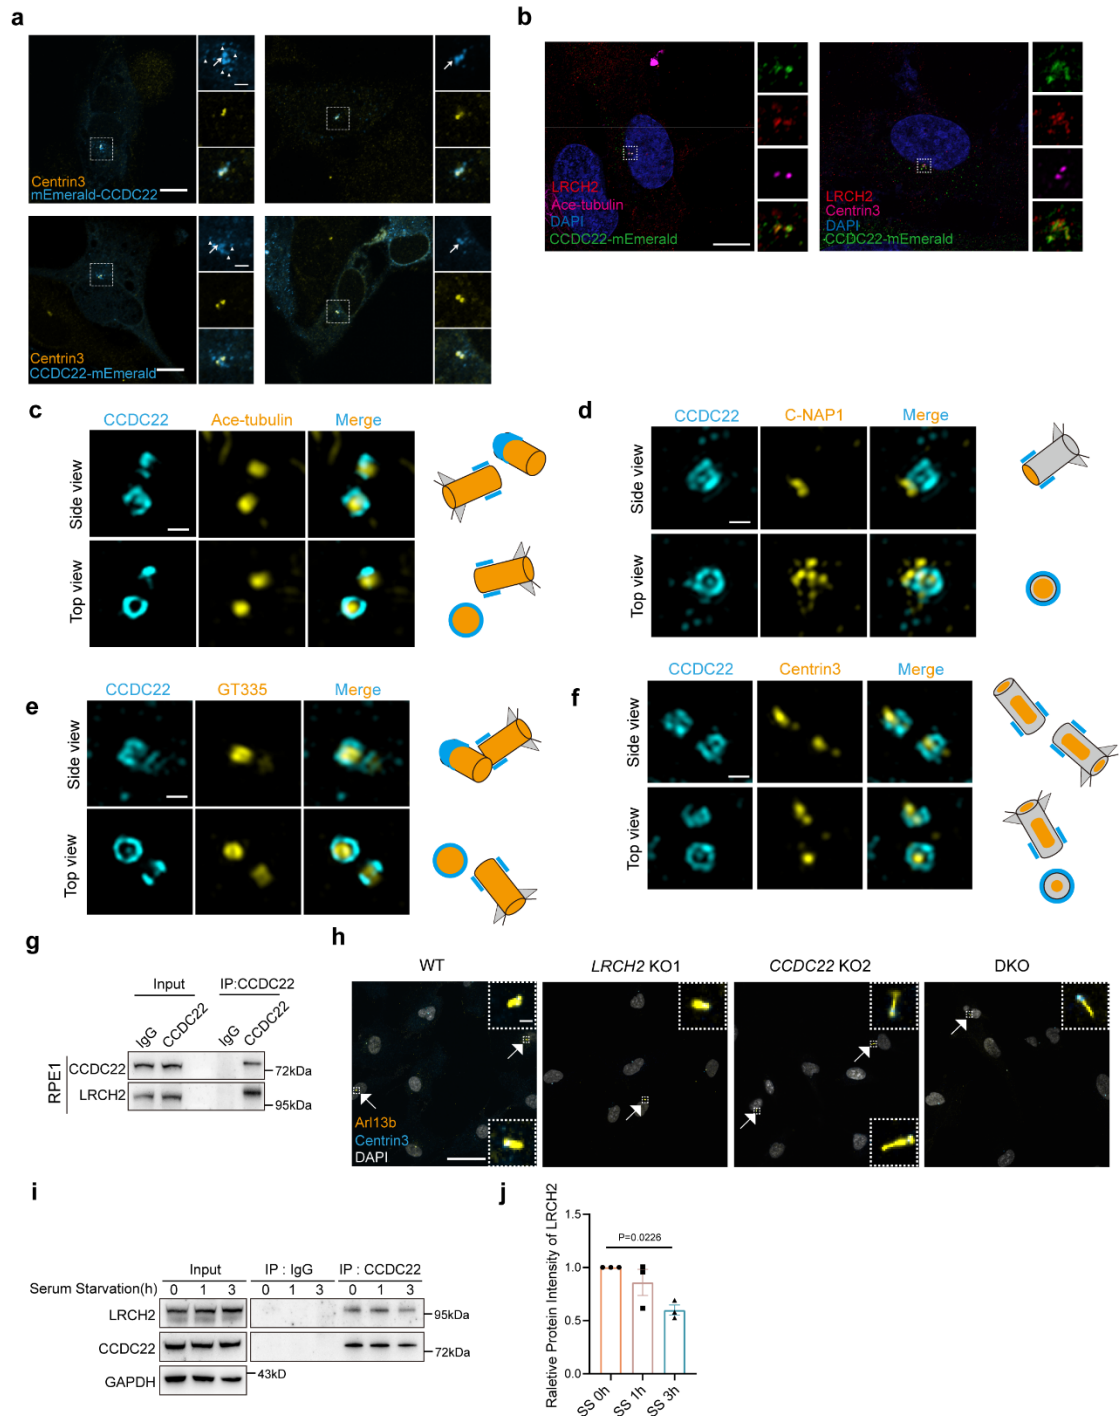

54

55 **Supplementary Fig. 7 | CCDC22 is also a centrosome protein and interacts with LRCH2.**

56 **a**, Confocal microscopy images of exogenous CCDC22 and Centrin3 (centrosomes).  
 57 Arrows indicate centrioles; arrowheads denote centriolar satellites. Scale bars: 10  $\mu$ m  
 58 insets). **b**, Immunofluorescence images of LRCH2(red), Ace-tubulin(pink), CCDC22-  
 59 mEmerald(green) and DAPI (nucleus, blue). Scale bars: 10  $\mu$ m (1  $\mu$ m for insets). **c**, Super-resolution  
 60 microscopy (SIM) of endogenous CCDC22 relative to acetylated tubulin (Ace-tubulin), with  
 61 corresponding top and side views. Scale bar, 0.4  $\mu$ m. **d**, SIM of endogenous CCDC22 relative to  
 62 C-NAP1. Scale bar, 0.4  $\mu$ m. **e**, SIM of endogenous CCDC22 relative to glutamylated tubulin. Scale  
 63 bar, 0.4  $\mu$ m. **f**, SIM of endogenous CCDC22 relative to Centrin3. Scale bar, 0.4  $\mu$ m. **g**, IP analysis

64 of LRCH2 and CCDC22 in RPE1 cells using an anti-CCDC22 antibody. **h**, Immunofluorescence  
65 images of cilia (Arl13b, yellow) and centrosome (Centrin3, blue) in WT, *LRCH2* KO cells,  
66 *CCDC22* KO cells and DKO cells. Scale bars: 20  $\mu\text{m}$  (2  $\mu\text{m}$  for insets). **i**, IP analysis of CCDC22  
67 and LRCH2 after serum starvation. **j**, Quantification of LRCH2 enrichment in **i**, Data are presented  
68 as mean  $\pm$  s.e.m.; n = 3 independent experiments. Statistical significance was assessed by one-way  
69 ANOVA with multiple comparisons.

70

71

72
